# Supplementary material
Source: publisher figshare collection journal article supplement (https://future-science-group.figshare.com/ndownloader/files/35458742)
Supplement: Supplementary file 1 [file 35458742]

**Supplemental Material**

**Title:** Breast milk-derived extracellular vesicle microRNA profiles are associated with maternal asthma and atopy: Findings from the PRogramming of Intergenerational Stress Mechanisms (PRISM) pregnancy cohort

**Figure S1:** Flowchart of mother-infant pairs with breast milk collected and included in microRNA analyses.


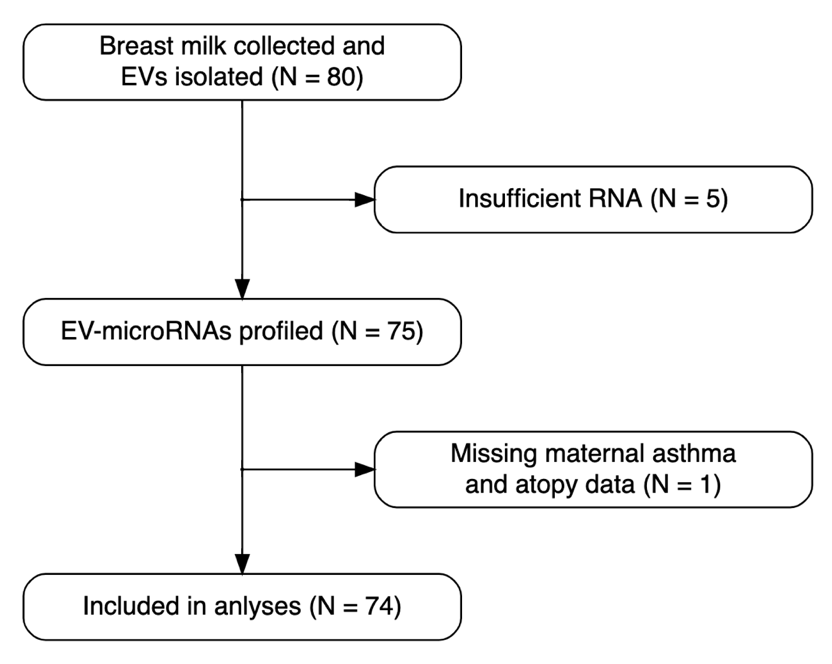


**Figure S2:** Raincloud plots of the nine EV-microRNAs with expression levels associated with maternal asthma active during pregnancy vs. never diagnosed (at *p* < 0.05; |*Bregression*| > 0.2).Associations of 130 microRNAs detected in ≥ 80% of samples were evaluated using robust linear regression adjusted for infant sex, maternal race, education, and postpartum week of breast milk collection.

**
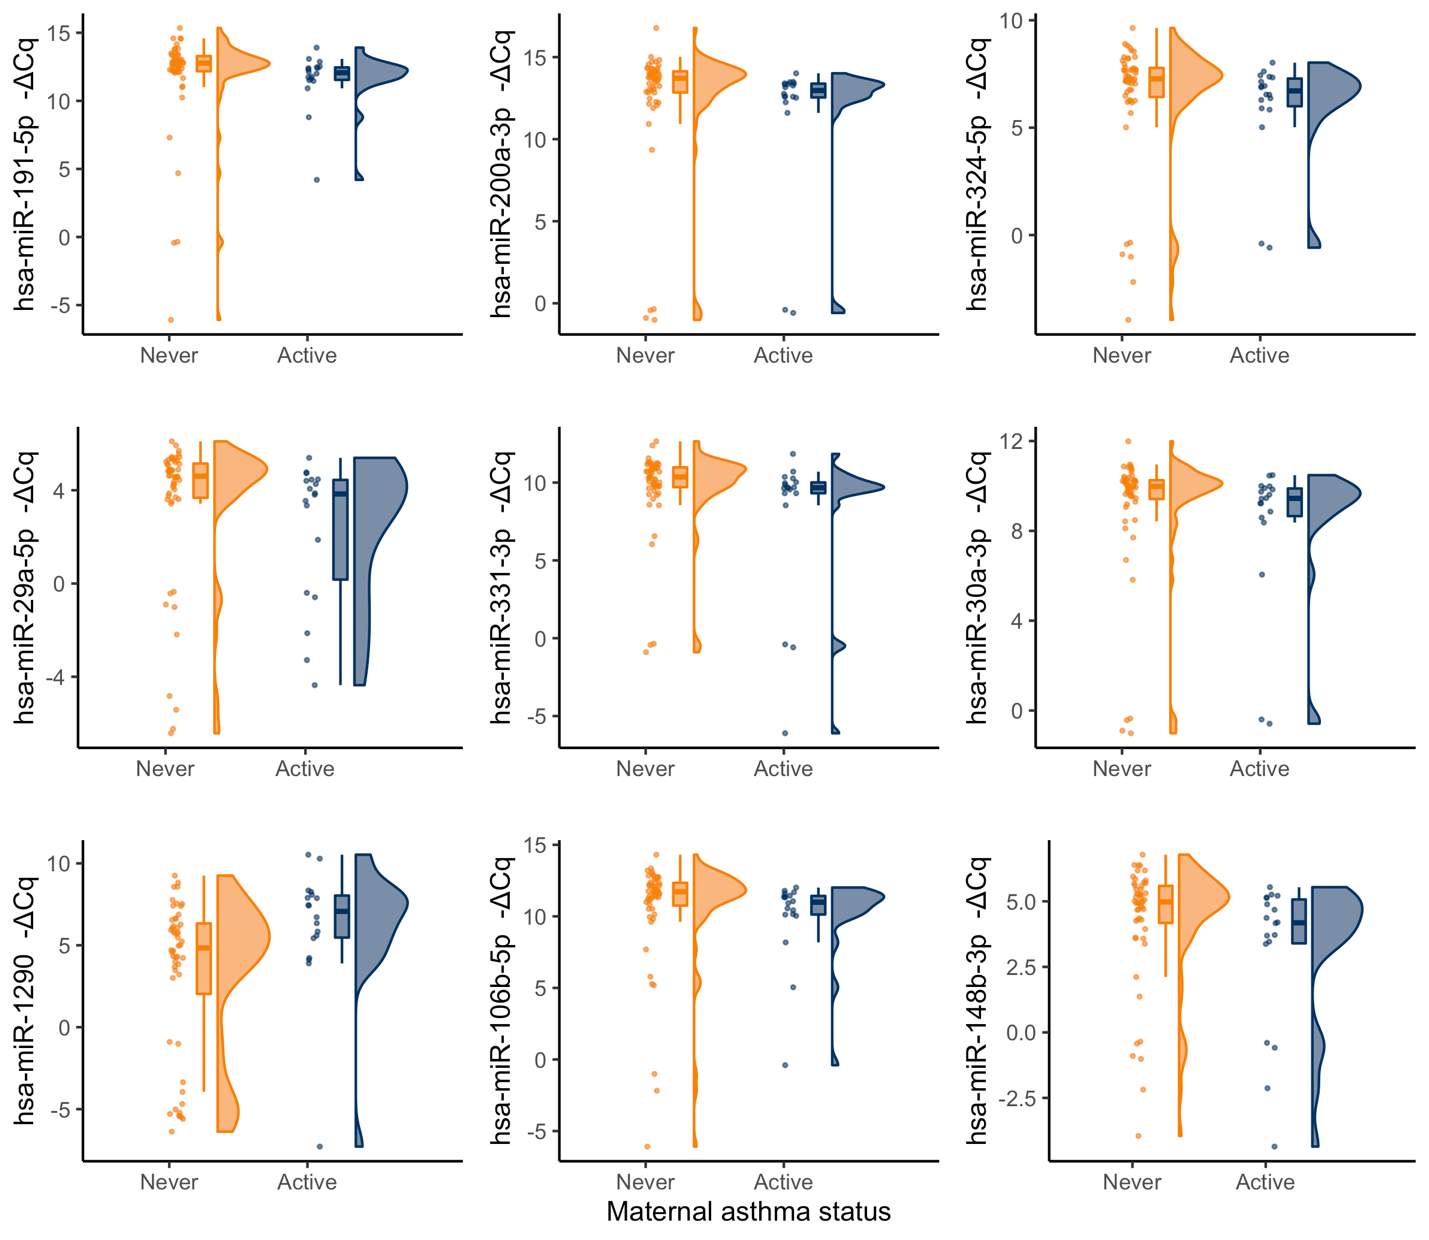
**

**Figure S3:** Spearman correlation matrix of the 9 EV-microRNAs associated with maternal asthma active during pregnancy vs. never diagnosed (at *p* < 0.05; |*Bregression*| > 0.2). Non-significant correlations are not shaded.

**Figure S4:** Raincloud plots of the EV-microRNAs with expression level associated with maternal atopy active during pregnancy vs. never diagnosed (at *p* < 0.05; |*Bregression*| > 0.2).Associations of 130 microRNAs detected in ≥ 80% of samples were evaluated using robust linear regression adjusted for infant sex, maternal race, education, and postpartum week of breast milk collection..

**
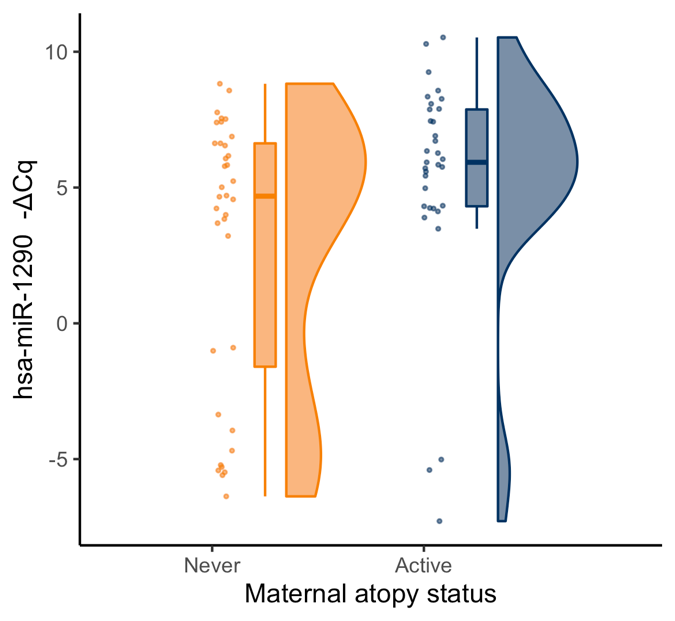
**
